# Supplementary material for: Securing timelines in the ancient Mediterranean using multiproxy annual tree-ring data
Source: PubMed Central journal article supplement — Proc Natl Acad Sci U S A. 2020 Mar 30;117(15):8410–5. doi: 10.1073/pnas.1917445117 (PMC7165418; doi:10.1073/pnas.1917445117), 2020-03-30
Supplement: pnas.1917445117.sapp.pdf [file pnas.1917445117.sapp.pdf]

## Supplementary Information for

### Securing time-lines in the ancient Mediterranean using multi-proxy annual tree-ring data

Charlotte Pearson, Matthew Salzer, Lukas Wacker, Peter Brewer, Adam Sookdeo and Peter Kuniholm

Charlotte Pearson  
E-mail: [c.pearson@ltrr.arizona.edu](mailto:c.pearson@ltrr.arizona.edu)

#### This PDF file includes:

Figs. S1 to S3  
Table S1

**Table S1. 186 Annual <sup>14</sup>C measurements from the Gordion tree-ring chronology with relative year identifiers and in calendar years BP according to the dating provided in this study.**

| Lab number | Tree number | 14C Age (BP) | +/- | Calendar year (BP) | Gordion relative year |
|------------|-------------|--------------|-----|--------------------|-----------------------|
| AA111568   | GOR-161     | 3403         | 28  | 3624               | 834                   |
| AA111567   | GOR-161     | 3418         | 23  | 3623               | 835                   |
| AA111566   | GOR-161     | 3388         | 22  | 3622               | 836                   |
| AA111565   | GOR-161     | 3392         | 22  | 3621               | 837                   |
| AA111564   | GOR-161     | 3409         | 26  | 3620               | 838                   |
| AA111563   | GOR-161     | 3401         | 22  | 3619               | 839                   |
| AA110982   | GOR-161     | 3389         | 21  | 3618               | 840                   |
| AA110981   | GOR-161     | 3416         | 21  | 3617               | 841                   |
| AA110980   | GOR-161     | 3396         | 22  | 3616               | 842                   |
| AA110979   | GOR-161     | 3398         | 23  | 3615               | 843                   |
| AA110978   | GOR-76      | 3406         | 21  | 3614               | 844                   |
| AA110977   | GOR-76      | 3389         | 21  | 3613               | 845                   |
| AA109766   | GOR-76      | 3367         | 30  | 3612               | 846                   |
| AA108803   | GOR-76      | 3364         | 24  | 3611               | 847                   |
| AA108800   | GOR-76      | 3402         | 24  | 3610               | 848                   |
| AA108804   | GOR-76      | 3403         | 21  | 3609               | 849                   |
| AA108801   | GOR-76      | 3399         | 21  | 3608               | 850                   |
| AA108805   | GOR-76      | 3429         | 21  | 3607               | 851                   |
| AA108766   | GOR-76      | 3416         | 23  | 3606               | 852                   |
| AA109070   | GOR-76      | 3365         | 26  | 3605               | 853                   |
| AA108802   | GOR-76      | 3405         | 21  | 3604               | 854                   |
| AA109021   | GOR-76      | 3370         | 21  | 3603               | 855                   |
| AA109022   | GOR-76      | 3382         | 23  | 3602               | 856                   |
| AA108767   | GOR-76      | 3427         | 23  | 3601               | 857                   |
| AA109023   | GOR-76      | 3409         | 20  | 3600               | 858                   |
| AA109071   | GOR-76      | 3367         | 23  | 3599               | 859                   |
| AA109072   | GOR-76      | 3388         | 23  | 3598               | 860                   |
| AA109073   | GOR-76      | 3370         | 24  | 3597               | 861                   |
| AA108768   | GOR-76      | 3436         | 23  | 3596               | 862                   |
| AA109767   | GOR-76      | 3400         | 29  | 3595               | 863                   |
| AA109768   | GOR-76      | 3380         | 22  | 3594               | 864                   |
| AA109769   | GOR-76      | 3441         | 23  | 3593               | 865                   |
| AA109770   | GOR-76      | 3367         | 22  | 3592               | 866                   |
| AA108769   | GOR-76      | 3405         | 23  | 3591               | 867                   |
| AA109771   | GOR-76      | 3356         | 22  | 3590               | 868                   |
| AA109772   | GOR-76      | 3380         | 25  | 3589               | 869                   |
| AA109773   | GOR-76      | 3395         | 23  | 3588               | 870                   |
| AA109774   | GOR-76      | 3394         | 37  | 3587               | 871                   |
| AA108770   | GOR-76      | 3394         | 23  | 3586               | 872                   |
| AA109775   | GOR-76      | 3372         | 31  | 3585               | 873                   |
| AA109776   | GOR-76      | 3411         | 27  | 3584               | 874                   |
| AA109777   | GOR-76      | 3397         | 39  | 3583               | 875                   |
| AA108707   | GOR-76      | 3380         | 25  | 3582               | 876                   |
| AA108708   | GOR-76      | 3374         | 27  | 3581               | 877                   |
| AA108709   | GOR-76      | 3395         | 25  | 3580               | 878                   |
| AA108710   | GOR-76      | 3380         | 26  | 3579               | 879                   |
| AA108711   | GOR-76      | 3326         | 28  | 3578               | 880                   |
| AA109074   | GOR-76      | 3372         | 24  | 3577               | 881                   |
| AA108763   | GOR-76      | 3370         | 28  | 3576               | 882                   |
| AA111069   | GOR-76      | 3395         | 21  | 3575               | 883                   |
| AA111548   | GOR-76      | 3450         | 22  | 3574               | 884                   |
| AA111070   | GOR-76      | 3294         | 20  | 3573               | 885                   |
| AA111071   | GOR-76      | 3373         | 20  | 3572               | 886                   |
| AA108780   | GOR-76      | 3372         | 21  | 3571               | 887                   |
| AA111072   | GOR-76      | 3381         | 20  | 3570               | 888                   |
| AA111073   | GOR-76      | 3404         | 21  | 3569               | 889                   |
| AA111074   | GOR-76      | 3349         | 24  | 3568               | 890                   |
| AA111075   | GOR-76      | 3317         | 20  | 3567               | 891                   |

| Lab number | Tree number | 14C Age (BP) | +/- | Calendar year (BP) | Gordion relative year |
|------------|-------------|--------------|-----|--------------------|-----------------------|
| AA108781   | GOR-76      | 3302         | 24  | 3566               | 892                   |
| AA111076   | GOR-76      | 3303         | 20  | 3565               | 893                   |
| AA111077   | GOR-76      | 3333         | 20  | 3564               | 894                   |
| AA111078   | GOR-76      | 3346         | 24  | 3563               | 895                   |
| AA111079   | GOR-76      | 3354         | 21  | 3562               | 896                   |
| AA111080   | GOR-76      | 3346         | 25  | 3561               | 897                   |
| AA111081   | GOR-76      | 3346         | 27  | 3560               | 898                   |
| AA111082   | GOR-76      | 3363         | 24  | 3559               | 899                   |
| AA111083   | GOR-76      | 3358         | 24  | 3558               | 900                   |
| AA111084   | GOR-76      | 3336         | 26  | 3557               | 901                   |
| AA111085   | GOR-76      | 3350         | 29  | 3556               | 902                   |
| AA111086   | GOR-76      | 3358         | 24  | 3555               | 903                   |
| AA111087   | GOR-76      | 3309         | 24  | 3554               | 904                   |
| AA111088   | GOR-76      | 3200         | 21  | 3553               | 905                   |
| AA111089   | GOR-76      | 3302         | 24  | 3552               | 906                   |
| AA111090   | GOR-76      | 3338         | 25  | 3551               | 907                   |
| AA111091   | GOR-76      | 3285         | 28  | 3550               | 908                   |
| AA111092   | GOR-76      | 3260         | 24  | 3549               | 909                   |
| AA111093   | GOR-76      | 3293         | 24  | 3548               | 910                   |
| AA111094   | GOR-76      | 3255         | 24  | 3547               | 911                   |
| AA111095   | GOR-76      | 3328         | 22  | 3546               | 912                   |
| AA111096   | GOR-76      | 3324         | 21  | 3545               | 913                   |
| AA111097   | GOR-76      | 3326         | 27  | 3544               | 914                   |
| AA111098   | GOR-76      | 3317         | 25  | 3543               | 915                   |
| AA111099   | GOR-76      | 3304         | 21  | 3542               | 916                   |
| AA111100   | GOR-76      | 3339         | 20  | 3541               | 917                   |
| AA111549   | GOR-76      | 3356         | 21  | 3540               | 918                   |
| AA111550   | GOR-76      | 3352         | 21  | 3539               | 919                   |
| AA111551   | GOR-76      | 3312         | 22  | 3538               | 920                   |
| AA111552   | GOR-76      | 3390         | 21  | 3537               | 921                   |
| AA111553   | GOR-76      | 3327         | 22  | 3536               | 922                   |
| AA111554   | GOR-76      | 3359         | 24  | 3535               | 923                   |
| AA111555   | GOR-76      | 3365         | 24  | 3534               | 924                   |
| AA110971   | GOR-76      | 3282         | 21  | 3533               | 925                   |
| AA110970   | GOR-76      | 3315         | 23  | 3532               | 926                   |
| AA110969   | GOR-76      | 3322         | 21  | 3531               | 927                   |
| AA110968   | GOR-76      | 3291         | 22  | 3530               | 928                   |
| AA110967   | GOR-76      | 3324         | 19  | 3529               | 929                   |
| AA110722   | GOR-76      | 3352         | 21  | 3528               | 930                   |
| AA110721   | GOR-76      | 3341         | 21  | 3527               | 931                   |
| AA110720   | GOR-76      | 3334         | 23  | 3526               | 932                   |
| AA110719   | GOR-76      | 3310         | 21  | 3525               | 933                   |
| AA110718   | GOR-76      | 3333         | 21  | 3524               | 934                   |
| AA110717   | GOR-76      | 3329         | 22  | 3523               | 935                   |
| AA110716   | GOR-76      | 3315         | 22  | 3522               | 936                   |
| AA110715   | GOR-76      | 3333         | 22  | 3521               | 937                   |
| AA110714   | GOR-76      | 3344         | 22  | 3520               | 938                   |
| AA110713   | GOR-76      | 3230         | 22  | 3519               | 939                   |
| AA110712   | GOR-76      | 3349         | 20  | 3518               | 940                   |
| AA110711   | GOR-76      | 3322         | 22  | 3517               | 941                   |
| AA110710   | GOR-76      | 3326         | 22  | 3516               | 942                   |
| AA110709   | GOR-76      | 3337         | 22  | 3515               | 943                   |
| AA110708   | GOR-76      | 3312         | 22  | 3514               | 944                   |
| AA110442   | GOR-76      | 3334         | 24  | 3513               | 945                   |
| AA110441   | GOR-76      | 3310         | 24  | 3512               | 946                   |
| AA110440   | GOR-76      | 3342         | 25  | 3511               | 947                   |
| AA110439   | GOR-76      | 3330         | 24  | 3510               | 948                   |
| AA110438   | GOR-76      | 3336         | 23  | 3509               | 949                   |
| AA110437   | GOR-76      | 3343         | 26  | 3508               | 950                   |
| AA110436   | GOR-76      | 3377         | 26  | 3507               | 951                   |

| Lab number | Tree number | 14C Age (BP) | +/- | Calendar year (BP) | Gordion relative year |
|------------|-------------|--------------|-----|--------------------|-----------------------|
| AA110435   | GOR-76      | 3324         | 30  | 3506               | 952                   |
| AA110434   | GOR-76      | 3353         | 25  | 3505               | 953                   |
| AA110433   | GOR-76      | 3309         | 25  | 3504               | 954                   |
| AA110432   | GOR-76      | 3353         | 25  | 3503               | 955                   |
| AA110431   | GOR-76      | 3303         | 25  | 3502               | 956                   |
| AA110430   | GOR-76      | 3352         | 25  | 3501               | 957                   |
| AA110411   | GOR-76      | 3360         | 24  | 3500               | 958                   |
| AA110412   | GOR-76      | 3379         | 23  | 3499               | 959                   |
| AA110413   | GOR-76      | 3399         | 23  | 3498               | 960                   |
| AA110414   | GOR-76      | 3420         | 24  | 3497               | 961                   |
| AA110415   | GOR-76      | 3297         | 23  | 3496               | 962                   |
| AA110416   | GOR-76      | 3333         | 23  | 3495               | 963                   |
| AA110417   | GOR-76      | 3319         | 24  | 3494               | 964                   |
| AA110418   | GOR-76      | 3314         | 23  | 3493               | 965                   |
| AA110419   | GOR-76      | 3306         | 24  | 3492               | 966                   |
| AA110420   | GOR-76      | 3316         | 25  | 3491               | 967                   |
| AA110421   | GOR-76      | 3301         | 25  | 3490               | 968                   |
| AA109778   | GOR-76      | 3287         | 22  | 3489               | 969                   |
| AA109779   | GOR-76      | 3310         | 22  | 3488               | 970                   |
| AA109780   | GOR-76      | 3322         | 22  | 3487               | 971                   |
| AA109781   | GOR-76      | 3320         | 22  | 3486               | 972                   |
| AA110322   | GOR-76      | 3293         | 23  | 3485               | 973                   |
| AA110323   | GOR-76      | 3266         | 23  | 3484               | 974                   |
| AA110324   | GOR-76      | 3290         | 23  | 3483               | 975                   |
| AA110325   | GOR-76      | 3318         | 24  | 3482               | 976                   |
| AA110326   | GOR-76      | 3316         | 24  | 3481               | 977                   |
| AA110327   | GOR-76      | 3307         | 29  | 3480               | 978                   |
| AA110328   | GOR-76      | 3283         | 26  | 3479               | 979                   |
| AA110329   | GOR-76      | 3284         | 23  | 3478               | 980                   |
| AA110330   | GOR-76      | 3286         | 25  | 3477               | 981                   |
| AA110331   | GOR-76      | 3263         | 23  | 3476               | 982                   |
| AA109853   | GOR-76      | 3249         | 22  | 3475               | 983                   |
| AA109854   | GOR-76      | 3304         | 24  | 3474               | 984                   |
| AA109855   | GOR-76      | 3305         | 24  | 3473               | 985                   |
| AA109734   | GOR-76      | 3282         | 22  | 3472               | 986                   |
| AA109735   | GOR-76      | 3292         | 23  | 3471               | 987                   |
| AA109736   | GOR-76      | 3271         | 26  | 3470               | 988                   |
| AA109737   | GOR-76      | 3285         | 22  | 3469               | 989                   |
| AA109738   | GOR-76      | 3292         | 32  | 3468               | 990                   |
| AA109739   | GOR-76      | 3271         | 23  | 3467               | 991                   |
| AA109740   | GOR-76      | 3279         | 22  | 3466               | 992                   |
| AA109974   | GOR-76      | 3296         | 22  | 3465               | 993                   |
| AA109975   | GOR-76      | 3303         | 24  | 3464               | 994                   |
| AA109976   | GOR-76      | 3257         | 22  | 3463               | 995                   |
| AA109977   | GOR-76      | 3243         | 22  | 3462               | 996                   |
| AA110406   | GOR-76      | 3297         | 23  | 3461               | 997                   |
| AA110407   | GOR-76      | 3298         | 23  | 3460               | 998                   |
| AA110408   | GOR-76      | 3292         | 23  | 3459               | 999                   |
| AA110409   | GOR-76      | 3365         | 23  | 3458               | 1000                  |
| AA110410   | GOR-76      | 3358         | 24  | 3457               | 1001                  |
| AA110427   | GOR-76      | 3269         | 32  | 3456               | 1002                  |
| AA110428   | GOR-76      | 3239         | 27  | 3455               | 1003                  |
| AA110429   | GOR-76      | 3253         | 25  | 3454               | 1004                  |
| AA110983   | GOR-76      | 3260         | 20  | 3453               | 1005                  |
| AA110984   | GOR-76      | 3254         | 35  | 3452               | 1006                  |
| AA110985   | GOR-76      | 3260         | 20  | 3451               | 1007                  |
| AA110986   | GOR-76      | 3241         | 20  | 3450               | 1008                  |
| AA110987   | GOR-76      | 3257         | 20  | 3449               | 1009                  |
| AA110988   | GOR-76      | 3235         | 25  | 3448               | 1010                  |
| AA110989   | GOR-76      | 3234         | 22  | 3447               | 1011                  |

| Lab number | Tree number | 14C Age (BP) | +/- | Calendar year (BP) | Gordion relative year |
|------------|-------------|--------------|-----|--------------------|-----------------------|
| AA110990   | GOR-76      | 3258         | 22  | 3446               | 1012                  |
| AA110991   | GOR-76      | 3235         | 20  | 3445               | 1013                  |
| AA110993   | GOR-76      | 3247         | 20  | 3444               | 1014                  |
| AA110994   | GOR-76      | 3228         | 22  | 3443               | 1015                  |
| AA110995   | GOR-76      | 3216         | 22  | 3442               | 1016                  |
| AA110996   | GOR-76      | 3215         | 22  | 3441               | 1017                  |
| AA110997   | GOR-76      | 3198         | 20  | 3440               | 1018                  |
| AA110998   | GOR-76      | 3206         | 20  | 3438               | 1019                  |

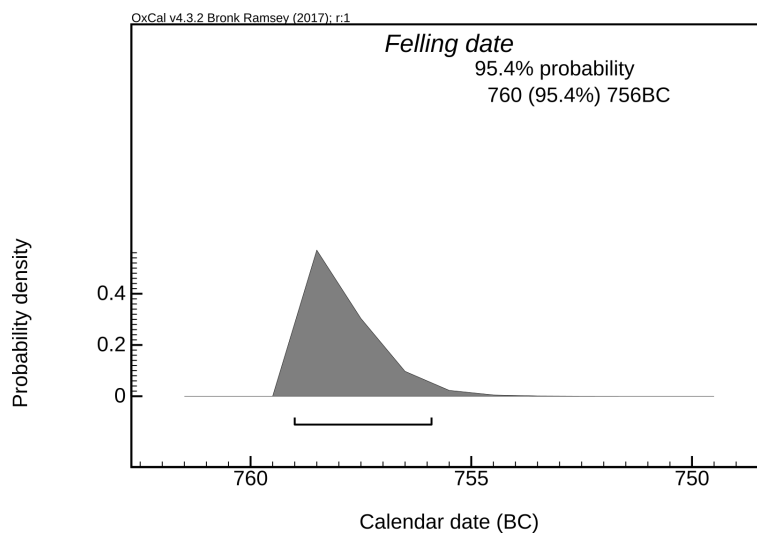

**Fig. S1.** OxCal plot (Ramsey, C.B., 2009. Bayesian analysis of radiocarbon dates. *Radiocarbon*, 51(1), pp.337-360.) generated using the IntCal13 (Reimer, P.J. et al., 2013. IntCal13 and Marine13 radiocarbon age calibration curves 0–50,000 years cal BP. *Radiocarbon*, 55(4), pp.1869-1887.) calibration curve to derive an end date for the wigglematched Gordion tree-ring sequence (Ramsey, C.B., van der Plicht, J. and Weninger, B., 2001. 'Wiggle matching' radiocarbon dates. *Radiocarbon*, 43(2A), pp.381-389.) using the single year radiocarbon data reported in this study. A gap of 97 years was added to the start of the single year sequence and 745 years were added at the end to represent the entire chronology. This replicates previous work. Relative to IntCal20, using OxCal4.3.2 the result for the same sequence is 750-747 BC, closely supporting our dating of within a year of 745 BC.

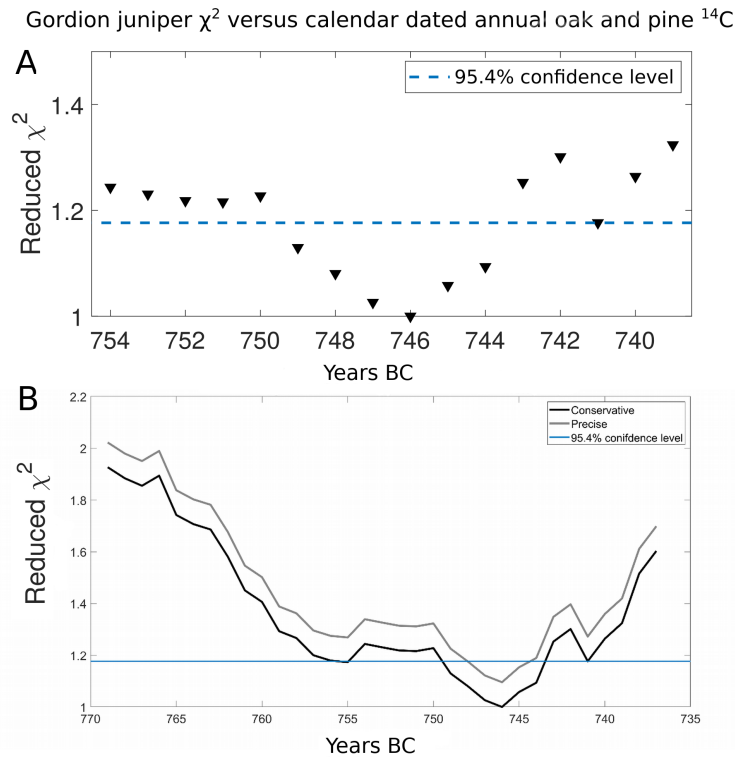

**Fig. S2.** A: Chi-squared test result ( $745 \pm 4$  BC at a 95.4% confidence level) for the annual juniper radiocarbon data versus the calendar dated oak and pine values (published Pearson et al. 2018, 2020). To arrive at this result we used equations outlined by Ramsey, C.B., van der Plicht, J. and Weninger, B., 2001. 'Wiggle matching' radiocarbon dates. Radiocarbon, 43(2A), pp.381-389, removing data points from the Gordion record lying outside the three-sigma range with two scenarios: 1) Precise, and 2) Conservative. (B shows the conservative value in black and the precise value in grey. The 95.4% CI was determined to be 1.18.) For the precise scenario, the results were generated using unmodified equations. This provides a narrow two-sigma range,  $746 \pm 2$  BC. Whereas, the conservative scenario – the minimum chi-squared value is set to 1 - broadens the range to  $745 \pm 4$  BC and absolutely at 755 BC. The absolute placement at 755 BC, however shows a clear misalignment in  $^{14}\text{C}$  structure when compared with the Pearson et al. 2018, 2020 data. This match is likely noise from our conservative scenario. Conversely, at  $745 \pm 4$  BC the alignment between the two patterns is clear. This produces a very similar result to that produced by OxCal (especially relative to IntCal20 which now includes the Pearson et al 2018, 2020 data), however this result is permanently fixed as it will not be subject to further changes with new iterations of the calibration curve or OxCal. SEA analysis was then used to test this placement and alternatives within the possible range. The result producing the best correlation via this alternate method was at 745 BC whether using the full Anatolian tree-ring sequence as shown in the text, or a truncated version (the statistically strongest portion of the chronology) from 1772 BC to 678 BC.

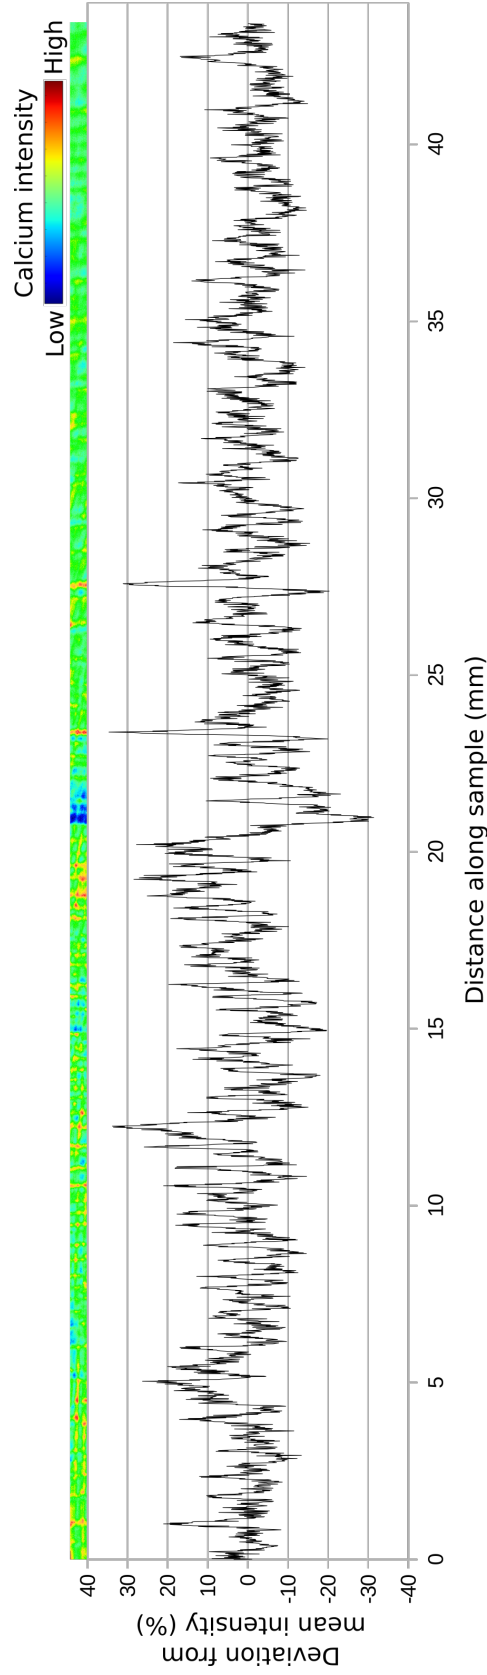

**Fig. S3.** A composite figure showing intensity of calcium (Ca) as determined by an XRF scan of Gordion juniper growth rings from 1600 BC to 1517 BC. An area scan ( $4096 \times 47$  resolution, pixel size 0.01 mm) is shown (left). The blue area at 21 mm (c.1650 BC) emphasizes that a depletion of Ca (with a slight following increase) is anomalous within the time period covered. The other data presented represents a single transect across the same tree rings illustrating the percentage deviation from the mean Ca intensity for the sample (a qualitative measure of the amount of Ca in the sample).
